# Supplementary material for: Glucose Uptake and Oxidative Stress in Caco-2 Cells: Health Benefits from Posidonia oceanica (L.) Delile
Source: MDPI journal article supplement (doi:10.3390/md20070457), 2022-07-14

## Supplementary Material

**Figure S1.** Effect of POE on Caco-2 cells viability. Caco-2 cells were incubated in the absence (Control cells) or in the presence of increasing concentrations of POE (5–40  $\mu\text{g}$  GAE/mL). Results are represented as mean  $\pm$  SD of 5 determinations carried out in triplicate.

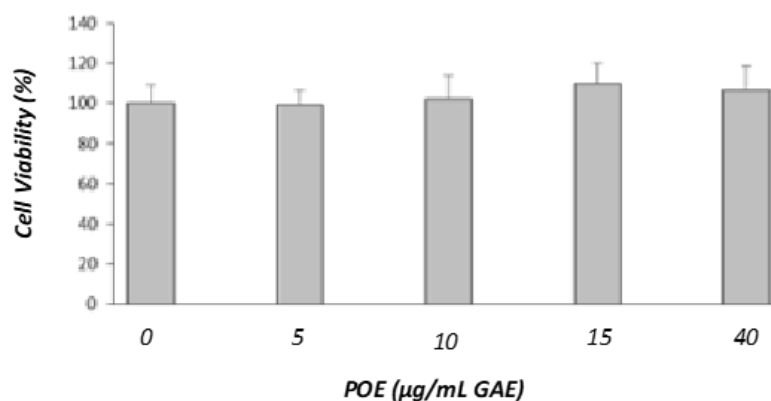

**Figure S2.** Effect of POE on HG-induced intracellular ROS formation. Intracellular ROS production was evaluated in Caco-2 cells incubated in the absence (Control cells) or in the presence of high-glucose condition (HG-cells) for 1 week and co-incubated with POE (0–40  $\mu\text{g}$  GAE/mL), for the last 24h. Values are represented as mean  $\pm$  SD of 4 determinations carried out in triplicate. \*\*\*Ctrl vs HG, \*\*\* HG vs HG+POE. (ANOVA, \*\*\*,  $p < 0.001$ )

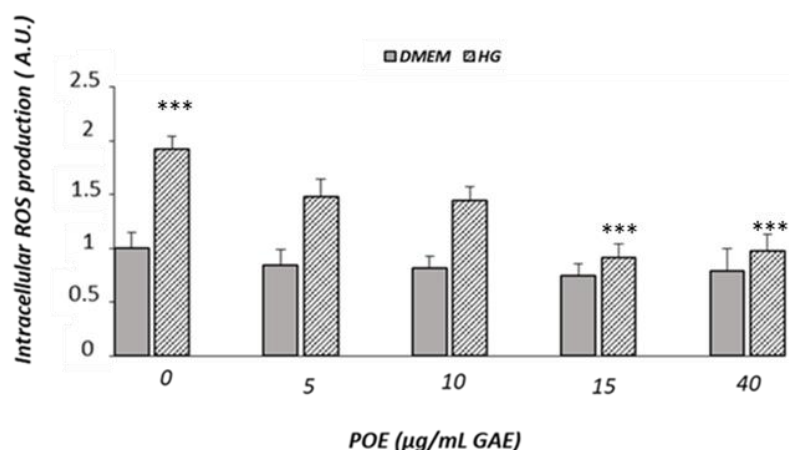

**Figure S3.** Effect of POE on HG-induced cell toxicity. Caco-2 cells incubated in the absence (Control cells) or in the presence of high-glucose condition (HG-cells) for 1 week and co-incubated with POE (15  $\mu$ g GAE/mL). Results are represented as mean  $\pm$  SD of 5 determinations carried out in triplicate. \*: vs Control ( $p < 0.05$ )

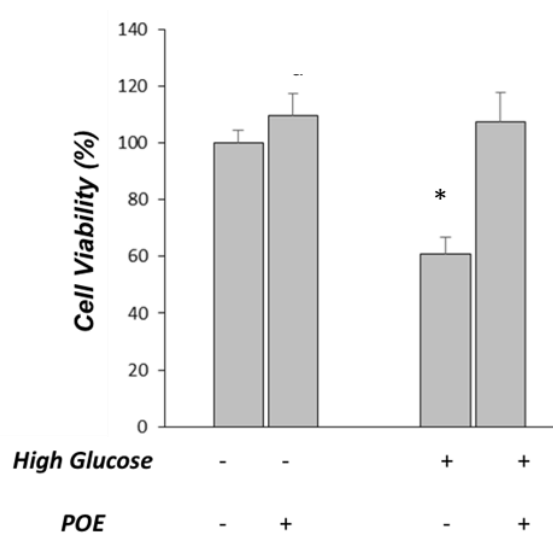

Supplement: s1 [file s1]
